# Supplementary material
Source: PubMed Central journal article supplement (PMC4794358)
Supplement: NIHMS750473-supplement.pdf [file NIHMS750473-supplement.pdf]

## Supplemental Figures and Legends

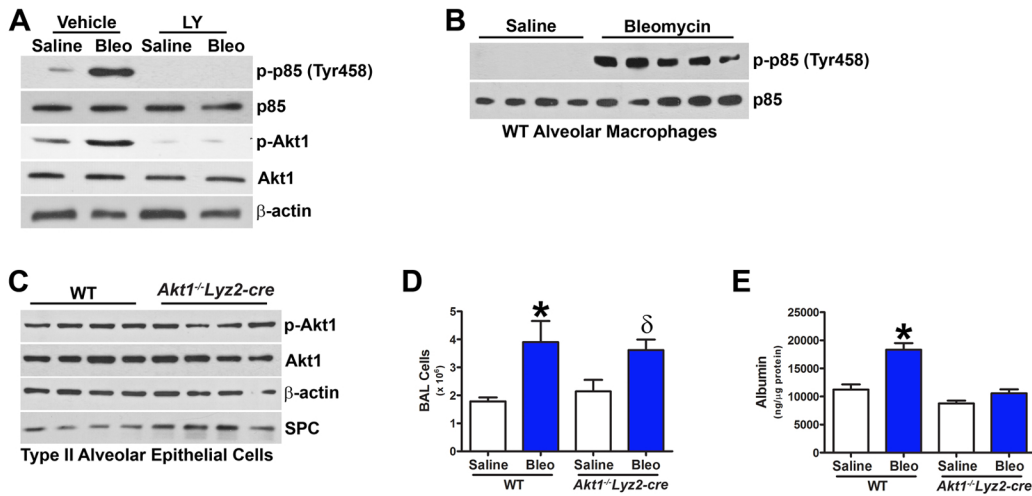

**Figure S1**

**Figure S1, related to Figure 1.** (A) Immunoblot analysis for p-p85 and p-Akt1 in macrophages exposed to saline or bleomycin (bleo) (12.5 mU/ml) in the presence of vehicle or 50  $\mu$ M LY294002 (LY). (B) Immunoblot analysis for p-p85 in alveolar macrophages isolated from WT mice exposed to saline or bleomycin. (C) Immunoblot analysis for p-Akt1 in type II alveolar epithelial cells isolated from WT and *Akt1<sup>-/-</sup>Lyz2-cre* mice. (D) Total number of BAL cells in WT ( $n = 4$  saline;  $n = 5$  bleo) and *Akt1<sup>-/-</sup>Lyz2-cre* mice ( $n = 4$  saline;  $n = 7$  bleo). (E) Albumin levels measured in BAL fluid from WT ( $n = 4$  saline;  $n = 5$  bleo) and *Akt1<sup>-/-</sup>Lyz2-cre* mice ( $n = 4$  saline;  $n = 6$  bleo). \*,  $p < 0.05$  vs WT+saline;  $\delta$ ,  $p < 0.05$  vs *Akt1<sup>-/-</sup>Lyz2-cre*+saline. One-way ANOVA with Tukey's comparison. See Figure 1 of main text.

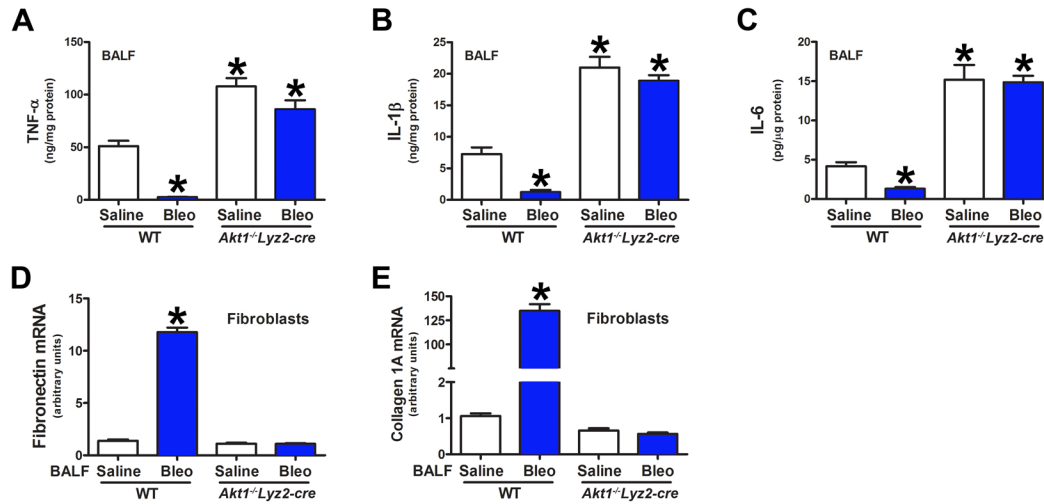

**Figure S2**

**Figure S2, related to Figure 2.** (A) TNF- $\alpha$ , (B) IL-1 $\beta$ , and (C) IL-6 levels were measured in BAL fluid from WT and *Akt1<sup>-/-</sup>Lyz2-cre* mice after saline or bleomycin exposure. WT ( $n = 4$  saline,  $n = 5$  bleo) and *Akt1<sup>-/-</sup>Lyz2-cre* ( $n = 4$  saline,  $n = 5$  bleo). Total RNA was isolated from normal lung fibroblasts conditioned with BAL fluid from exposed WT and *Akt1<sup>-/-</sup>Lyz2-cre* mice. (D) Fibronectin and (E) collagen 1A mRNA were measured and expressed in arbitrary units.  $n = 4$  per saline group and  $n = 5$  per bleomycin group. \*,  $p < 0.05$  vs WT+saline. One-way ANOVA with Tukey's comparison. See Figure 2 of main text.

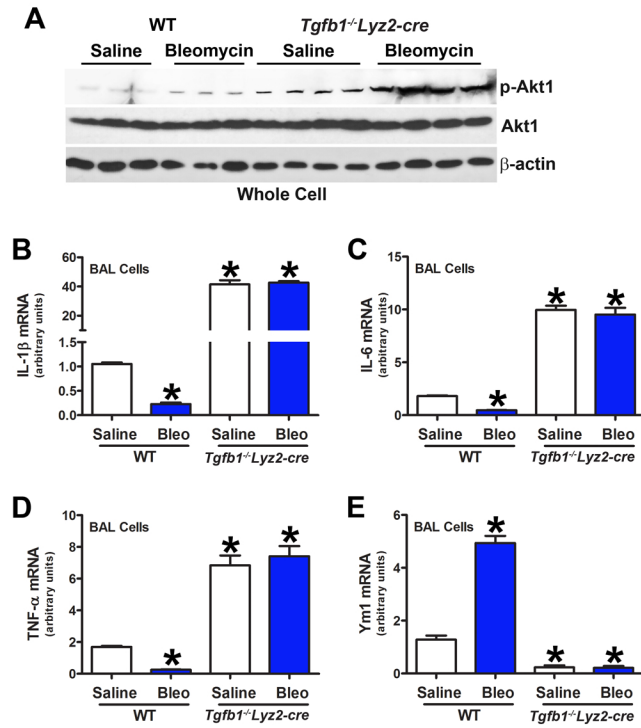

**Figure S3**

**Figure S3, related to Figure 3.** (A) Representative immunoblot analysis for p-Akt1, Akt1, and  $\beta$ -actin exposure ( $n = 6$ ) in BAL cells from WT and *Tgfb1<sup>-/-</sup>Lyz2-cre* mice were exposed to saline or bleomycin. (B) IL-1 $\beta$ , (C) IL-6, (D) TNF- $\alpha$  and (E) Ym-1 mRNA levels were measured in BAL cells from WT and *Tgfb1<sup>-/-</sup>Lyz2-cre* mice after saline or bleomycin exposure ( $n = 6$ ). \*,  $p < 0.05$  vs WT+saline. One-way ANOVA with Tukey's comparison. See Figure 3 of main text.

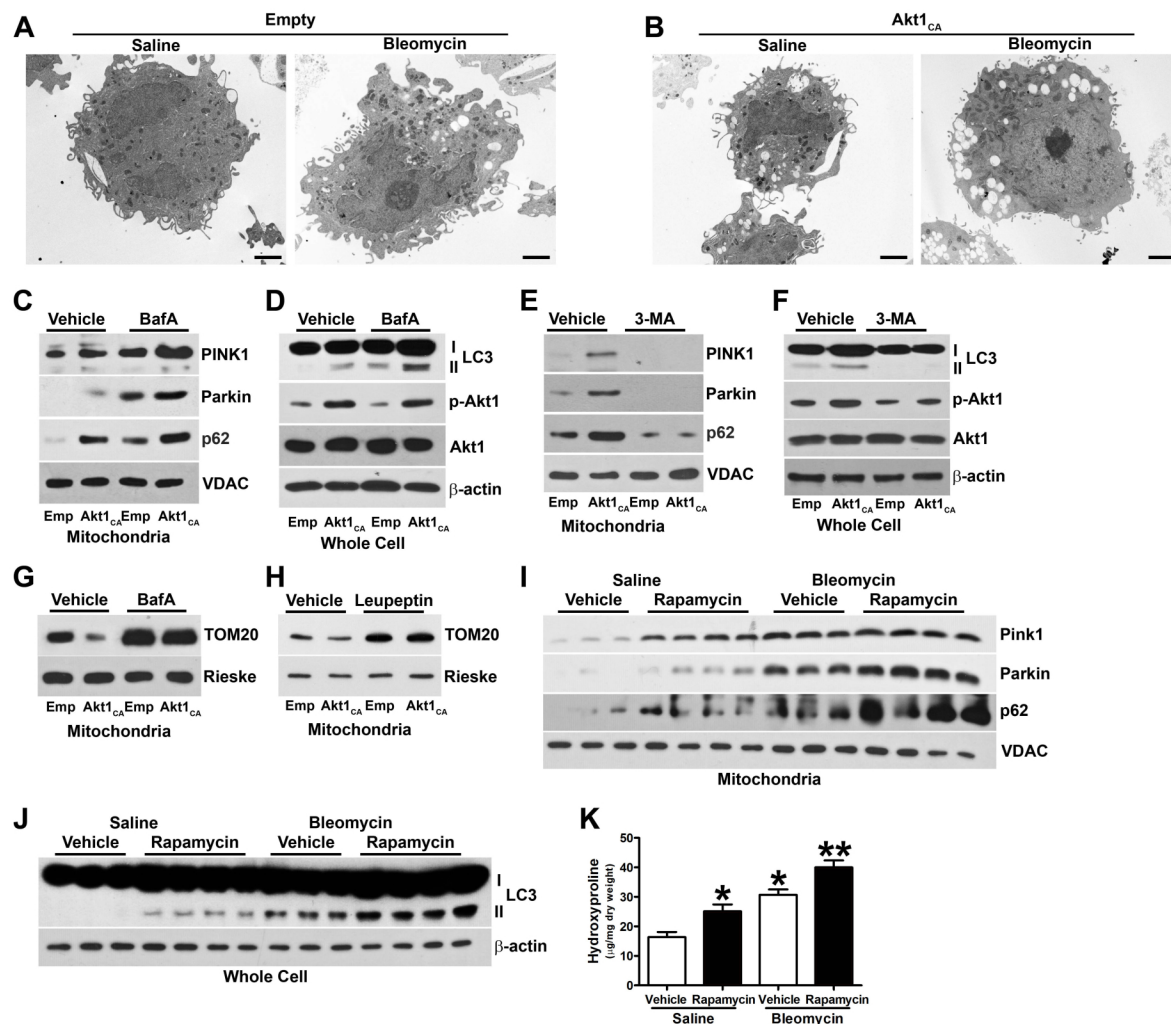

**Figure S4**

**Figure S4, related to Figure 4.** THP-1 cells expressing an empty vector or Akt1<sub>CA</sub> were treated with bleomycin and analyzed by transmission electron microscopy. (**A** and **B**) Bar = 2 μm. (**C**) Mitochondrial PINK1, Parkin, and p62, and (**D**) LC3-I and -II expression were determined in MH-S cells expressing an empty vector or Akt1<sub>CA</sub> and treated with vehicle or Bafilomycin A (Baf A) (100 nM) for 5 h. (**E**) Mitochondrial PINK1, Parkin, and p62, and (**F**) LC3-I and -II expression were determined in MH-S cells expressing an empty vector or Akt1<sub>CA</sub> and treated with vehicle or 3-methyladenine (3-MA) (10 mM). Mitochondrial TOM20 expression was determined by immunoblot analysis in MH-S cells expressing an empty vector or Akt1<sub>CA</sub> and treated with vehicle or (**G**) Bafilomycin A (Baf A) or (**H**) leupeptin (50 μg/ml). (**I**) Mitochondrial PINK1, Parkin, and p62, and (**J**) LC3-I and -II expression were measured in alveolar macrophages isolated by BAL in saline or bleomycin-exposed WT mice treated with daily i.p. injections of vehicle or rapamycin (3 mg/kg). (**K**) Hydroxyproline assay in excised lungs, *n* = 5 for Saline+vehicle, rapamycin, and Bleomycin+Vehicle, *n* = 4 for Bleomycin+rapamycin. \*, *p* < 0.05 vs Saline+Vehicle, \*\* *p* < 0.05 vs all conditions. One-way ANOVA with Tukey's comparison. See Figure 4 of main text.

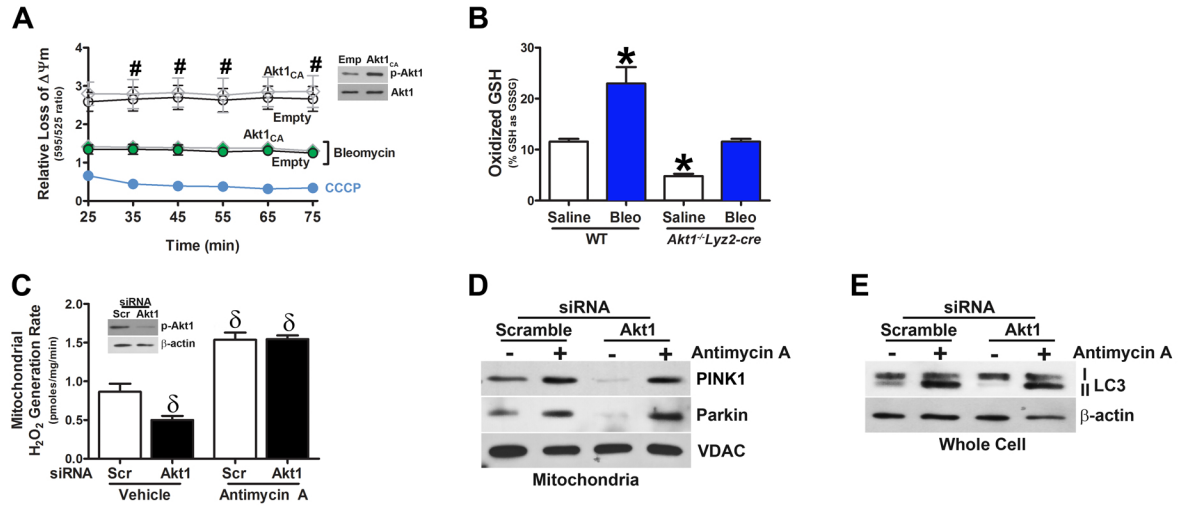

**Figure S5**

**Figure S5, related to Figure 5.** (A) THP-1 cells expressing empty or Akt1<sub>CA</sub> vectors were treated with bleomycin (12.5 μg/ml). Mitochondrial membrane potential was measured using JC-1 dye (10 μg/ml) at indicated times. Inset, Akt1 overexpression was verified by immunoblot analysis.  $n = 6$  per group. Carbonyl cyanide m-chlorophenyl hydrazone (CCCP). BAL was performed on exposed WT and Akt1<sup>-/-</sup>Lyz2-cre mice. (B) GSH and GSSG were measured by HPLC and mass spectrophotometry and expressed as oxidized glutathione (GSSG) relative to its reduced form (GSH). WT ( $n = 4$  saline;  $n = 5$  bleo) and Akt1<sup>-/-</sup>Lyz2-cre mice ( $n = 4$  saline;  $n = 6$  bleo). (C) Mitochondrial H<sub>2</sub>O<sub>2</sub>, (D) mitochondrial PINK1 and Parkin, and (E) LC3-I and -II expression were measured in macrophages transfected with scrambled or Akt1 siRNA and treated with Antimycin A. Inset, Akt1 silencing verified by immunoblot analysis.  $n = 6$ . \*,  $p < 0.05$  vs WT+saline; #,  $p < 0.05$  vs Empty+bleo and Akt1+bleo; δ,  $p < 0.05$  vs Vehicle+scr. One-way ANOVA with Tukey's comparison. See Figure 5 of main text.

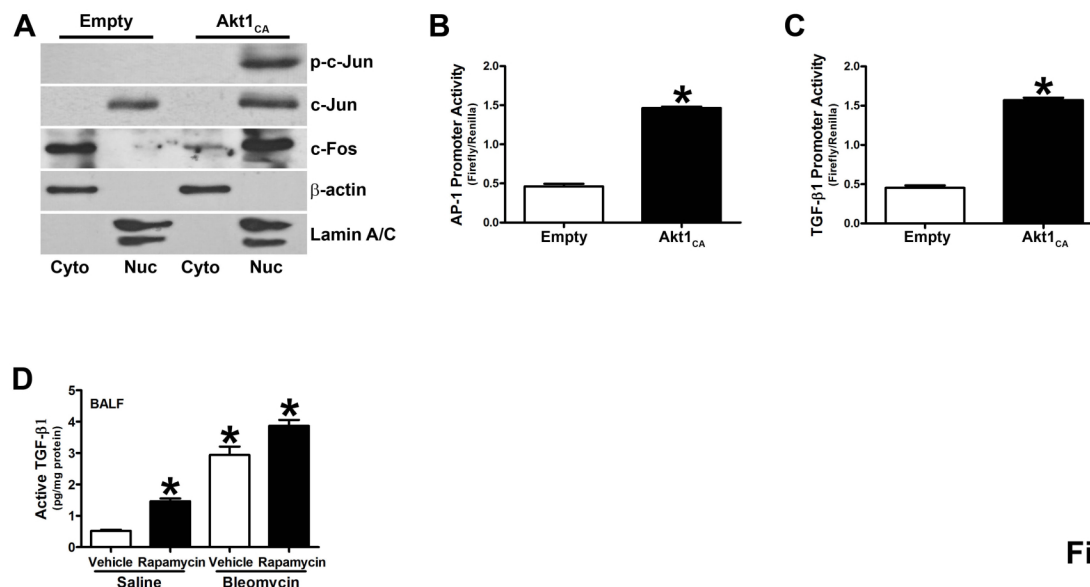

**Figure S6**

**Figure S6, related to Figure 6.** (A) MH-S cells expressing empty or Akt1<sub>CA</sub> vectors were isolated into cytoplasmic (cyto) or nuclear (nuc) fractions. P-c-Jun, c-Jun, and c-Fos were analyzed by immunoblot analysis. (B) AP-1 and (C) TGF- $\beta$ 1 promoter activity were measured in MH-S cells expressing empty or Akt1<sub>CA</sub>.  $n = 6$ . (D) Active TGF- $\beta$ 1 measured in BAL fluid from WT mice exposed to saline or bleomycin and treated with vehicle or rapamycin (3 mg/kg, i.p. daily).  $n = 5$  per group. \*,  $p < 0.05$  vs all conditions. One-way ANOVA with Tukey's comparison. See Figure 6 of main text.

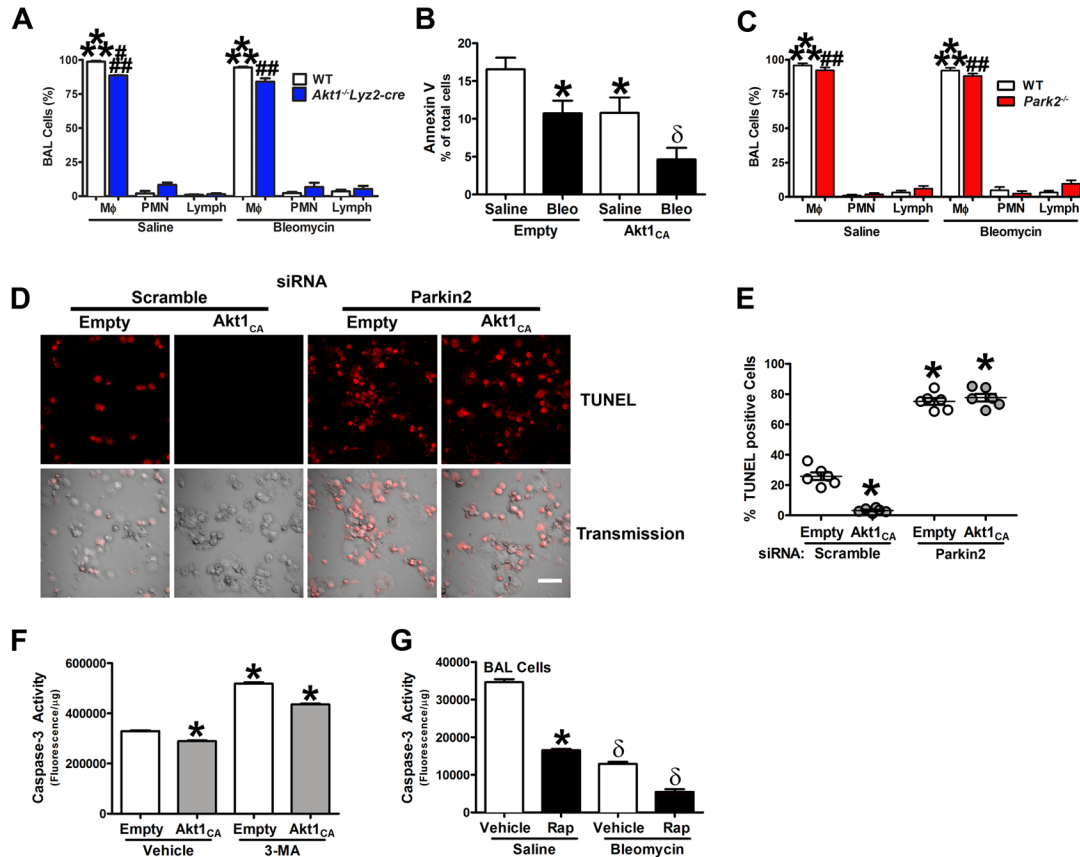

**Figure S7**

**Figure S7, related to Figure 7.** (A) Cell differential determined using Wright-Giemsa stain from BAL performed in WT ( $n = 4$  saline;  $n = 5$  bleo) and *Akt1<sup>-/-</sup>Lyz2-cre* mice ( $n = 4$  saline;  $n = 7$  bleo). Polymorphonuclear (PMN). (B) Flow cytometry of Annexin V in MH-S cells expressing empty or Akt1<sub>CA</sub> and treated with saline or bleomycin,  $n = 5$ . (C) Cell differential determined using Wright-Giemsa stain from BAL performed in WT and *Park2<sup>-/-</sup>* mice ( $n = 5$ ). (D) Representative images of TUNEL staining and (E) quantification of TUNEL positive cells in THP-1 cells transfected with scramble or Parkin2 siRNA in combination with empty or Akt1<sub>CA</sub> vectors.  $n = 6$ , each dot represents an average of 6 images. Bar = 40  $\mu$ m. (F) Caspase-3 activity measured in MH-S cells expressing empty or Akt1<sub>CA</sub> and treated with 3-MA,  $n = 5$ . (G) Caspase-3 activity measured in alveolar macrophages isolated by BAL from exposed WT mice given vehicle or rapamycin,  $n = 5$  per group. \*,  $p < 0.05$  vs Empty+saline, Empty+scramble, Vehicle+empty or Saline+vehicle;  $\delta$ ,  $p < 0.05$  vs all conditions; \*\*\*,  $p < 0.0001$  vs PMN and Lymph; ##,  $p < 0.01$  vs WT+saline or WT+bleomycin; ###,  $p < 0.0001$  vs WT+saline. One-way ANOVA with Tukey's comparison. See Figure 7 of main text.

## Supplemental Experimental Procedures

### Materials

Bleomycin was obtained from the University of Iowa Hospitals and Clinics hospital stores.  $\alpha$ -ketoglutarate, p-Hydroxylphenyl acetic acid (pHPA), antimycin A, bafilomycin A (Baf A), carbonyl cyanide m-chlorophenylhydrazone (CCCP), horseradish peroxidase (HRP) and LY294002 (LY) were purchased from Sigma Chemical Company (St. Louis, MO). Leupeptin and 3-Methyladenine (3-MA) were purchased from Millipore.

### Mice

*Akt1<sup>-/-</sup>Lyz2-cre* mice were generated by selective disruption of *Akt1* gene in the cells of the granulocyte/monocyte lineage by crossing *Akt1<sup>fl/fl</sup>* mice (a generous gift from Dr. Morris Birnbaum, University of Pennsylvania, Philadelphia, PA) with mice containing a Cre recombinase under the control of the Lysozyme M promoter. *Tgfb1<sup>-/-</sup>Lyz2-cre* mice were generated in a similar manner. Mice were intratracheally administered 1.75-2 U/kg of bleomycin or saline, as a negative control, after being anesthetized with 3% isoflurane using a precision Fortec vaporizer (Cyprane, Keighley, UK). Rapamycin (LC Laboratories) was diluted in DMSO and administered by intraperitoneal (i.p.) injections daily of 3 mg/kg. Rapamycin or DMSO control i.p. injections were given 6 h post administration of bleomycin or saline and continued for 20 days.

### Cell Culture

Macrophages were maintained in RPMI 1640 media with 10% fetal bovine serum and penicillin/streptomycin supplements. IMR-90 normal human lung fibroblast and IPF fibroblasts were cultured in DMEM supplemented with 10% fetal bovine serum, streptomycin, and amphotericin B. All experiments were conducted in RPMI containing 0.5% serum.

### Isolation of Mitochondria and Cytoplasm

Cell fractions were prepared as described previously (He et al., 2011).

### Quantitative Real Time PCR

Human TGF- $\beta$ 1, human hypoxanthine-guanine phosphoribosyltransferase (HPRT), human IL-10, human mannose receptor, mouse  $\beta$ -actin, mouse IL-1 $\beta$ , mouse TGF- $\beta$ 1, mouse TNF- $\alpha$ , and mouse *Ym1* primers are previously described (Larson-Casey et al., 2014; Murthy et al., 2015). The following primer sets were also used: human collagen 1 $\alpha$ , 5'-GCT CGT GGA AAT GAT GGT GC-3' and 5'-ACC AGG TTC ACC GCT GTT AC-3'; human fibronectin, 5'-TGT TAT GGA GGA AGC CGA GGT T-3' and 5'-CGA TGC AGG TAC AGT CCC AGA-3'; mouse IL-6, 5'-CAG AAT TGC CAT CGT ACA ACT CTT TTC-3' and 5'-AAG TGC ATC ATC GTT GTT CAT ACA-3'. Data was calculated by the cycle threshold ( $\Delta$ CT) method. The mRNA measurements were normalized to  $\beta$ -actin or HPRT and expressed in arbitrary units.

### Immunoblot Analysis

Primary antibodies used: rabbit monoclonal anti-phospho-SMAD2 (Ser465/467) (138D4); rabbit monoclonal anti-SMAD2 (D43B4), rabbit polyclonal anti-phospho-Akt (Ser473), rabbit polyclonal anti-Akt, rabbit monoclonal anti-Caspase-3 (8G10), rabbit polyclonal anti-LC3A/B, rabbit polyclonal anti-Lamin A/C, rabbit polyclonal anti-phospho-PI3 Kinase p85 (Tyr458), rabbit polyclonal anti-PI3 Kinase p85, and rabbit polyclonal anti-VDAC (Cell Signaling); rabbit polyclonal anti-Parkin, rabbit polyclonal anti-PINK1, mouse monoclonal anti-Mitofusion-2, mouse monoclonal anti-UQCRCFS1 (5A5) (anti-Rieske), and mouse monoclonal anti-SQSTM1/p62 (Abcam); rabbit polyclonal anti-Prosurfactant Protein C (Millipore); rabbit polyclonal anti-c-Fos (4), rabbit polyclonal anti-c-Jun (H-79), mouse monoclonal anti-p-c-Jun (KM-1), rabbit polyclonal anti-TOM20 (FL-145) (Santa Cruz); mouse monoclonal anti-alpha-smooth muscle actin ( $\alpha$ -SMA) (American Research Products); and mouse monoclonal anti- $\beta$ -actin (AC-15) (Sigma).

### Glutathione Assay

Reduced (GSH) and oxidized glutathione (GSSG) in lung were measured by high-performance liquid chromatography (HPLC) and mass spectrometry analysis as previously described (Murthy et al., 2015).

### TUNEL Assay

Detection of apoptosis was determined in macrophages and in BAL cells from WT, *Akt1<sup>-/-</sup>Lyz2-cre*, and *Park2<sup>-/-</sup>* mice exposed to saline or bleomycin by TUNEL analysis as previously described (Larson-Casey et al., 2014).

### Mitochondrial Membrane Potential

Cells were loaded with JC-1 dye (Molecular Probes) at a final concentration of 10  $\mu$ g/ml for 15 min at 37 °C. After incubation, cells were washed twice. Fluorescence was measured using a SpectraMax M2 plate reader. CCCP, at a final concentration of 30  $\mu$ M, was used as a positive control in all experiments.

### Hydroxyproline Determination



Lung tissue was dried to a stable weight and acid hydrolyzed with 6N HCl for 24 h at 112 °C. Hydroxyproline concentration was normalized to the dry weight of the lung, as described previously (Murthy et al., 2009).

## References and Notes

- Larson-Casey, J.L., Murthy, S., Ryan, A.J., and Carter, A.B. (2014). Modulation of the mevalonate pathway by Akt regulates macrophage survival and development of pulmonary fibrosis. *J Biol Chem* 289, 36204-36219.
- Murthy, S., Adamcakova-Dodd, A., Perry, S.S., Tephly, L.A., Keller, R.M., Metwali, N., Meyerholz, D.K., Wang, Y., Glogauer, M., Thorne, P.S., and Carter, A.B. (2009). Modulation of reactive oxygen species by Rac1 or catalase prevents asbestos-induced pulmonary fibrosis. *Am J Physiol Lung Cell Mol Physiol* 297, L846-855.
- Murthy, S., Larson-Casey, J.L., Ryan, A.J., He, C., Kobzik, L., and Carter, A.B. (2015). Alternative activation of macrophages and pulmonary fibrosis are modulated by scavenger receptor, macrophage receptor with collagenous structure. *FASEB J*.
- Murthy, S., Ryan, A., He, C., Mallampalli, R.K., and Carter, A.B. (2010). Rac1-mediated Mitochondrial H<sub>2</sub>O<sub>2</sub> Generation Regulates MMP-9 Gene Expression in Macrophages via Inhibition of SP-1 and AP-1. *J Biol Chem* 285, 25062-25073.
